# Supplementary material for: Combined Effects of Temperature and Salinity on Polyps and Ephyrae of Aurelia solida (Cnidaria: Scyphozoa)
Source: MDPI journal article supplement (doi:10.3390/d13110573), 2021-11-10
Supplement: s1 [file s1]

**Table S1.** Statistical analysis for the asexual reproduction of *Aurelia solida* polyps kept under several combinations of different temperatures and salinities. Results of post-hoc pairwise Tukey Tests with significant differences indicated by different letters (a–k).

| Temperature | Salinity | response | SE   | df  | lower CL | upper CL | Group               |
|-------------|----------|----------|------|-----|----------|----------|---------------------|
| 12          | 20       | 1,3      | 0,42 | 444 | 0,68     | 2,46     | a                   |
| 12          | 25       | 4,32     | 0,94 | 444 | 2,82     | 6,62     | a b c               |
| 12          | 30       | 8,1      | 1,56 | 444 | 5,55     | 11,83    | b c d e             |
| 12          | 35       | 7,84     | 1,44 | 444 | 5,47     | 11,24    | b c d e             |
| 12          | 37       | 6,38     | 1,22 | 444 | 4,37     | 9,3      | b c                 |
| 12          | 40       | 3,69     | 0,84 | 444 | 2,36     | 5,77     | a b                 |
| 16          | 20       | 5,33     | 1,09 | 444 | 3,57     | 7,96     | b c                 |
| 16          | 25       | 18,15    | 2,75 | 444 | 13,47    | 24,44    | f g h i             |
| 16          | 30       | 20,1     | 3,05 | 444 | 14,92    | 27,09    | f g h i j           |
| 16          | 35       | 21,26    | 3,15 | 444 | 15,89    | 28,44    | f g h i j           |
| 16          | 37       | 14,47    | 2,34 | 444 | 10,53    | 19,88    | d f g               |
| 16          | 40       | 9,22     | 1,61 | 444 | 6,53     | 13,01    | c d e               |
| 20          | 20       | 13,65    | 2,19 | 444 | 9,97     | 18,71    | d e f               |
| 20          | 25       | 30,68    | 4,31 | 444 | 23,29    | 40,43    | j k                 |
| 20          | 30       | 33,26    | 4,64 | 444 | 25,29    | 43,76    | k                   |
| 20          | 35       | 24,91    | 3,6  | 444 | 18,75    | 33,08    | h i j k             |
| 20          | 37       | 23,49    | 3,46 | 444 | 17,59    | 31,37    | g h i j k           |
| 20          | 40       | 18,07    | 2,75 | 444 | 13,41    | 24,37    | f g h i             |
| 24          | 20       | 14,27    | 2,27 | 444 | 10,43    | 19,5     | d f g               |
| 24          | 25       | 27,64    | 3,98 | 444 | 20,83    | 36,68    | h j k               |
| 24          | 30       | 27,47    | 3,92 | 444 | 20,75    | 36,35    | h j k               |
| 24          | 35       | 25,94    | 3,73 | 444 | 19,56    | 34,41    | h i j k             |
| 24          | 37       | 24,52    | 3,59 | 444 | 18,38    | 32,7     | h i j k             |
| 24          | 40       | 18,16    | 2,76 | 444 | 13,48    | 24,47    | f g h i             |
| 28          | 20       | 0,72     | 0,72 | 444 | 0,1      | 5,17     | a b c d e f g h i j |
| 28          | 25       | 13,66    | 2,21 | 444 | 9,95     | 18,77    | d e f               |
| 28          | 30       | 17,21    | 2,64 | 444 | 12,73    | 23,27    | f g i               |
| 28          | 35       | 17,22    | 2,68 | 444 | 12,68    | 23,38    | f g i               |
| 28          | 37       | 13,5     | 2,19 | 444 | 9,82     | 18,55    | d e f               |
| 28          | 40       | 6,66     | 1,36 | 444 | 4,46     | 9,94     | b c e               |
