# Supplementary material for: Combined Effects of Temperature and Salinity on Polyps and Ephyrae of Aurelia solida (Cnidaria: Scyphozoa)
Source: MDPI journal article supplement (doi:10.3390/d13110573), 2021-11-10
Supplement: s1 [file s1]

**Table S2.** Statistical analysis for the growth of *Aurelia solida* ephyrae kept under several combinations of different temperatures and salinities. Results of post-hoc Tukey's HSD test. Significant results ( $p < 0.05$ ) are highlighted in bold.

| Tukey's HSD     |                 |                 |                 |                 |                 |                 |                 |                 |
|-----------------|-----------------|-----------------|-----------------|-----------------|-----------------|-----------------|-----------------|-----------------|
|                 | 10 °C<br>35 psu | 10 °C<br>40 psu | 15 °C<br>20 psu | 15 °C<br>35 psu | 15 °C<br>40 psu | 20 °C<br>20 psu | 20 °C<br>35 psu | 20 °C<br>40 psu |
| 10 °C<br>20 psu | 0,999           | 1,000           | 0,081           | 0,225           | 0,461           | < <b>0.001</b>  | <b>0,043</b>    | 1,000           |
| 10 °C<br>35 psu |                 | 1,000           | 0,154           | 0,408           | 0,727           | < <b>0.001</b>  | 0,074           | 1,000           |
| 10 °C<br>40 psu |                 |                 | 0,223           | 0,440           | 0,680           | < <b>0.001</b>  | 0,076           | 1,000           |
| 15 °C<br>20 psu |                 |                 |                 | 1,000           | 0,975           | < <b>0.001</b>  | 0,844           | 0,590           |
| 15 °C<br>35 psu |                 |                 |                 |                 | 1,000           | < <b>0.001</b>  | 0,650           | 0,797           |
| 15 °C<br>40 psu |                 |                 |                 |                 |                 | < <b>0.001</b>  | 0,462           | 0,925           |
| 20 °C<br>20 psu |                 |                 |                 |                 |                 |                 | 0,144           | < <b>0.001</b>  |
| 20 °C<br>35 psu |                 |                 |                 |                 |                 |                 |                 | 0,200           |
